# Supplementary material
Source: PubMed Central journal article supplement (PMC5864032)

SUPPLEMENTARY DATA

**Supplementary Table 1.** Adverse Events (AE)

|                                     | Combination Therapy | Insulin Therapy | P-Value |
|-------------------------------------|---------------------|-----------------|---------|
| Any AE (% of patients)              | 90                  | 93              | NS      |
| <b>Therapy Related AEs</b>          |                     |                 |         |
| Hypoglycemia                        |                     |                 |         |
| % of patients                       | 66                  | 91              | <0.0001 |
| Incidence rate (event/patient year) | 2.3                 | 6.6             | <0.0001 |
| Sever hypoglycemia (n)              | 0                   | 1               |         |
| Ankle edema (%)                     | 9.3                 | 3.4             | <0.01   |
| Injection site reaction (%)         | 1.6                 | 0               |         |
| Gastrointestinal (%)                | 31                  | 9               | <0.0001 |
| <b>Series AD</b>                    |                     |                 |         |
| CV events (n)                       | 0                   | 5               |         |
| Cancer (n)                          | 0                   | 1               |         |
| Fractures (n)                       | 0                   | 0               |         |
| Death (n)                           | 0                   | 1               |         |

SUPPLEMENTARY DATA

Supplementary Figure 1. Qatar Study profile

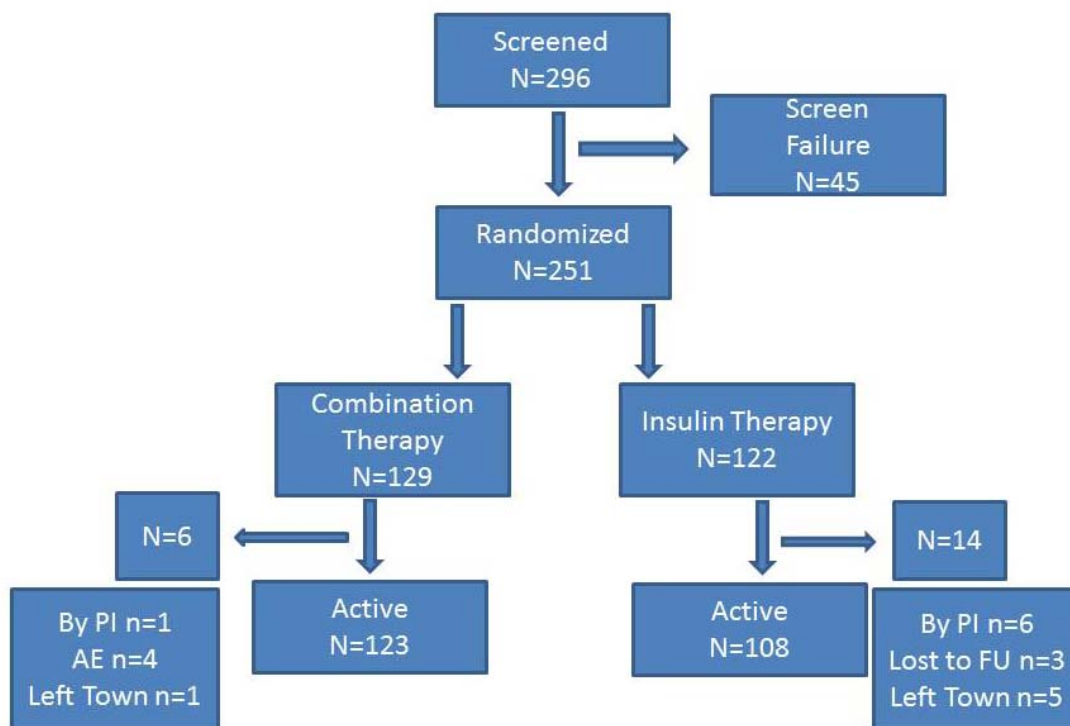

SUPPLEMENTARY DATA

Supplementary Figure 2. Change in sulfonylurea dose through the study

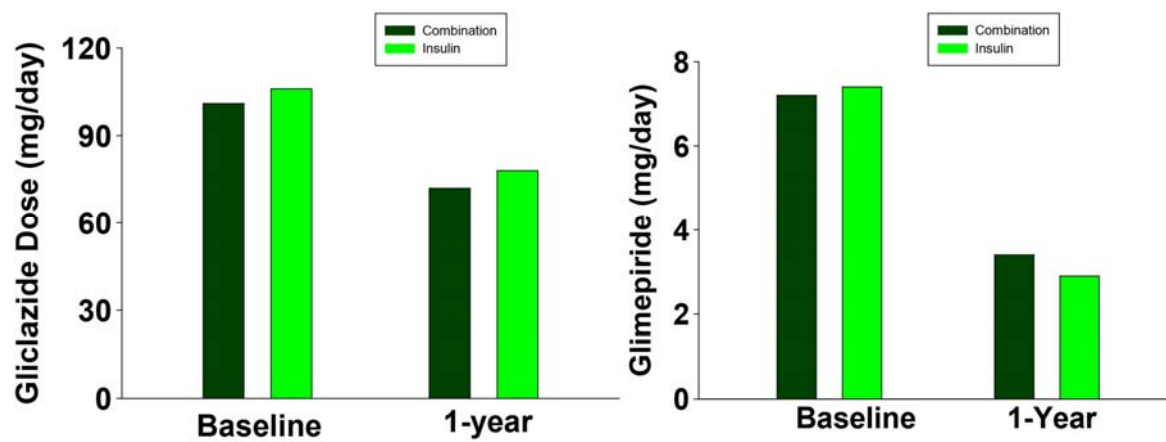

SUPPLEMENTARY DATA

**Supplementary Figure 3.** the mean glargine and aspart dose in patients in the Insulin Therapy arm at 3, 6, 12 and 18 months

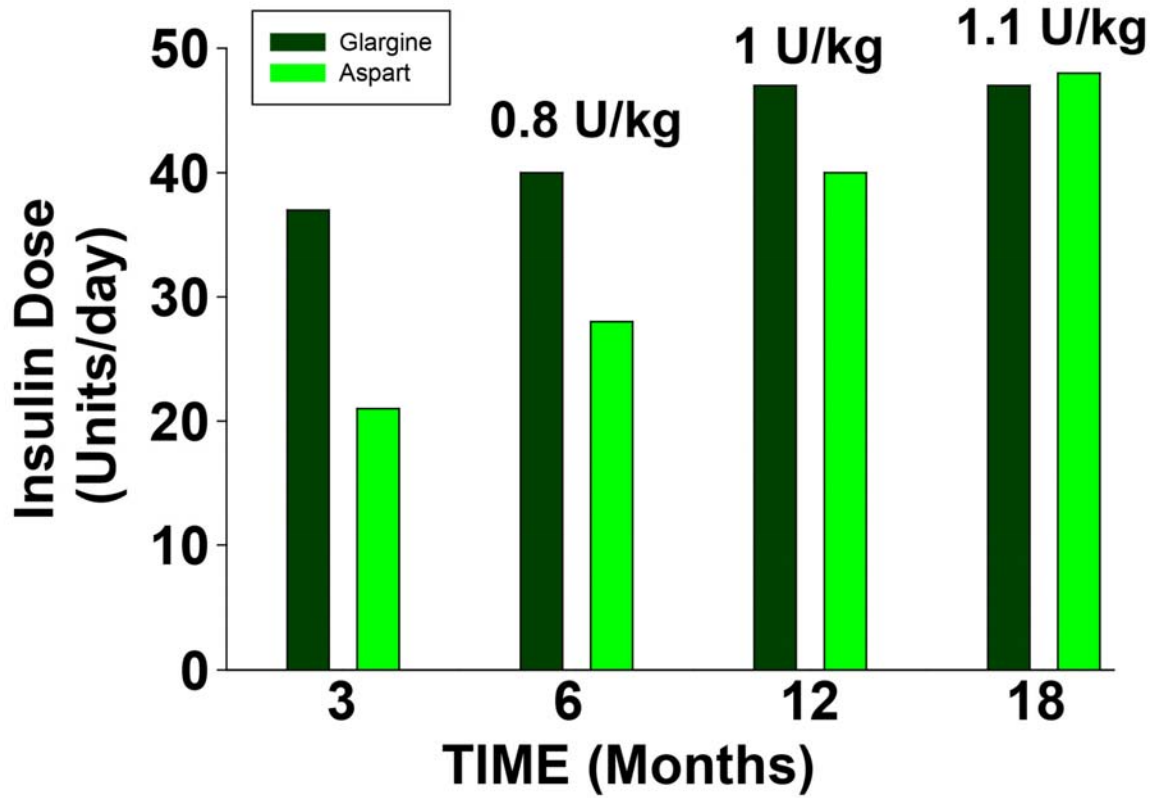

SUPPLEMENTARY DATA

**Supplementary Figure 4.** Change in HbA1c in subjects in the Combination Therapy group stratified based upon ethnicity.

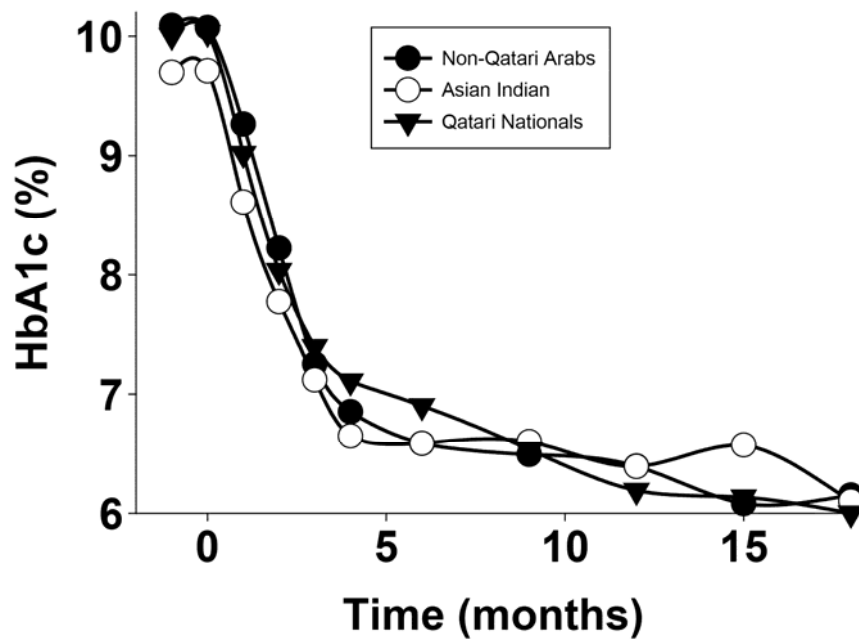

Supplement: DC161738SupplementaryData.pdf [file DC161738SupplementaryData.pdf]
